# Supplementary material
Source: publisher figshare collection journal article supplement (https://frontiersin.figshare.com/ndownloader/files/31589321)
Supplement: Supplementary file 1 [file 31589321]

Appendix In-situ test results of the studied samples (MgCO3, CaCO3, FeCO3, wt.%; Trace element and La, Ce, Nd, μg/g)

| Spots | MgCO3 | CaCO3 | FeCO3 | Sc | V | Cr | Co | Ni | Cu | Ga | Rb | Sr | Ba | La | Ce | Nd |
| --- | --- | --- | --- | --- | --- | --- | --- | --- | --- | --- | --- | --- | --- | --- | --- | --- |
| J-1-1 | 2.27 | 3.00 | 33.97 | 9.43 | 96.64 | 34.75 | 38.76 | 46.61 | 14.12 | 8.96 | 1.67 | 44.89 | 19.62 | 21.59 | 49.13 | 30.06 |
| J-1-2 | 3.24 | 0.14 | 33.29 | 3.46 | 185.25 | 16.66 | 54.00 | 114.10 | 0.00 | 33.94 | 0.65 | 4.07 | 2.41 | 0.94 | 2.22 | 1.64 |
| J-1-3 | 3.19 | 2.11 | 34.50 | 9.48 | 150.69 | 56.79 | 51.01 | 109.93 | 1.16 | 23.53 | 3.96 | 60.22 | 26.98 | 33.40 | 55.93 | 20.31 |
| J-6-1 | 7.04 | 2.50 | 43.70 | 6.26 | 175.14 | 89.60 | 2.18 | 34.62 | 0.71 | 15.04 | 0.72 | 36.83 | 16.77 | 7.17 | 17.02 | 10.07 |
| J-6-2 | 7.26 | 2.86 | 45.62 | 6.76 | 167.94 | 79.10 | 2.73 | 35.37 | 0.00 | 14.46 | 0.70 | 42.00 | 20.38 | 8.47 | 21.07 | 11.70 |
| J-6-3 | 7.28 | 2.49 | 45.25 | 6.94 | 167.93 | 88.49 | 2.41 | 37.09 | 0.70 | 13.68 | 0.96 | 30.56 | 19.71 | 4.47 | 11.24 | 5.59 |
| J-6-4 | 11.40 | 31.29 | 20.85 | 24.53 | 35.88 | 22.63 | 0.86 | 4.08 | 1.50 | 1.56 | 0.57 | 277.34 | 36.63 | 5.34 | 11.72 | 6.78 |
| J-6-5 | 7.03 | 2.79 | 44.63 | 6.38 | 163.35 | 82.90 | 3.21 | 39.20 | 0.83 | 14.23 | 1.54 | 35.20 | 21.00 | 6.50 | 15.56 | 7.81 |
| J-6-6 | 6.87 | 5.22 | 42.67 | 6.16 | 147.67 | 103.98 | 2.64 | 33.55 | 0.67 | 13.61 | 1.04 | 100.16 | 45.51 | 39.69 | 103.20 | 61.59 |
| J-6-7 | 7.04 | 4.62 | 47.01 | 7.22 | 133.10 | 82.85 | 1.90 | 26.90 | 1.31 | 10.22 | 2.45 | 74.00 | 37.42 | 25.97 | 64.45 | 37.41 |
| J-6-8 | 6.71 | 6.33 | 41.54 | 7.34 | 138.32 | 101.91 | 2.48 | 32.62 | 0.45 | 13.74 | 0.91 | 139.16 | 49.23 | 53.88 | 142.86 | 91.77 |
| J-6-9 | 6.89 | 6.36 | 42.86 | 7.22 | 141.18 | 91.95 | 1.64 | 33.69 | 0.00 | 14.75 | 0.65 | 134.46 | 47.65 | 55.12 | 145.63 | 93.38 |
| J-6-10 | 7.49 | 6.27 | 51.64 | 8.74 | 134.93 | 87.05 | 1.58 | 26.69 | 0.54 | 10.71 | 0.29 | 108.28 | 39.83 | 39.47 | 104.64 | 63.71 |
| J-12-1 | 7.49 | 1.70 | 38.31 | 6.65 | 204.51 | 49.71 | 19.20 | 82.15 | 1.56 | 22.41 | 0.00 | 21.00 | 17.07 | 5.50 | 14.58 | 10.66 |
| J-12-2 | 6.97 | 1.63 | 40.36 | 7.32 | 204.08 | 50.31 | 17.59 | 80.93 | 0.22 | 24.01 | 0.14 | 17.77 | 22.50 | 3.86 | 7.77 | 4.77 |
| J-12-3 | 6.54 | 1.34 | 36.23 | 5.39 | 216.31 | 82.62 | 19.19 | 91.88 | 3.86 | 25.57 | 0.46 | 19.75 | 18.73 | 4.55 | 12.69 | 9.26 |
| J-12-4 | 7.37 | 1.42 | 38.19 | 6.80 | 207.51 | 122.25 | 20.03 | 92.07 | 0.68 | 28.67 | 1.35 | 25.01 | 31.45 | 3.31 | 7.57 | 3.61 |
| J-16-1 | 6.93 | 2.37 | 27.47 | 4.19 | 181.61 | 133.73 | 15.55 | 103.19 | 5.66 | 21.67 | 2.58 | 59.27 | 18.30 | 22.07 | 62.35 | 45.36 |
| J-16-2 | 7.23 | 1.11 | 29.01 | 3.83 | 193.75 | 142.54 | 15.69 | 115.00 | 8.26 | 24.00 | 2.83 | 36.16 | 15.45 | 10.41 | 30.06 | 21.71 |
| J-16-3 | 7.61 | 1.53 | 29.81 | 2.98 | 194.14 | 138.46 | 13.72 | 119.71 | 1.81 | 24.37 | 0.38 | 42.52 | 11.50 | 12.93 | 39.76 | 31.78 |
| J-16-4 | 7.55 | 1.52 | 29.25 | 2.58 | 196.66 | 143.20 | 12.85 | 118.57 | 0.47 | 27.11 | 0.40 | 45.79 | 12.21 | 14.93 | 44.54 | 35.28 |
| J-16-5 | 7.54 | 1.18 | 29.39 | 2.55 | 201.55 | 150.02 | 12.36 | 115.37 | 0.76 | 25.14 | 0.08 | 35.86 | 9.99 | 10.15 | 31.00 | 24.82 |
| J-16-6 | 7.48 | 1.42 | 29.14 | 2.55 | 199.43 | 139.34 | 12.23 | 113.16 | 0.13 | 24.29 | 0.10 | 38.78 | 12.85 | 11.86 | 37.53 | 26.60 |
| J-5-1 | 1.79 | 5.79 | 85.51 | 18.36 | 92.71 | 25.35 | 66.79 | 8.34 | 0.99 | 1.40 | 0.26 | 52.69 | 75.38 | 31.46 | 74.13 | 43.32 |
| J-5-2 | 0.96 | 5.97 | 85.81 | 15.10 | 56.72 | 19.53 | 64.90 | 4.83 | 0.95 | 2.17 | 0.05 | 44.54 | 82.32 | 37.33 | 88.37 | 53.92 |
| J-5-3 | 1.97 | 5.29 | 83.17 | 19.54 | 112.97 | 26.27 | 67.20 | 6.09 | 0.77 | 1.01 | 0.40 | 42.36 | 82.09 | 26.31 | 62.75 | 39.11 |
| J-5-4 | 3.47 | 3.55 | 66.21 | 25.93 | 170.90 | 45.62 | 74.01 | 34.94 | 52.36 | 4.19 | 5.30 | 62.82 | 125.37 | 29.40 | 62.07 | 33.35 |
| J-5-5 | 1.63 | 5.63 | 86.80 | 17.77 | 88.44 | 24.77 | 69.23 | 8.31 | 0.26 | 1.68 | 0.11 | 38.59 | 80.18 | 25.50 | 58.23 | 37.43 |
| J-5-6 | 2.88 | 4.46 | 76.82 | 22.44 | 141.55 | 38.03 | 56.83 | 11.72 | 2.67 | 2.19 | 0.79 | 34.18 | 78.06 | 17.49 | 38.13 | 23.33 |
| J-5-7 | 1.20 | 5.74 | 85.25 | 13.29 | 62.45 | 22.58 | 62.67 | 3.48 | 0.95 | 1.58 | 0.24 | 42.67 | 73.51 | 34.11 | 82.20 | 51.86 |
| J-5-8 | 1.14 | 5.40 | 86.70 | 13.98 | 60.86 | 16.84 | 63.18 | 7.47 | 1.33 | 2.09 | 0.16 | 41.37 | 76.64 | 32.19 | 77.40 | 49.64 |
| J-5-9 | 3.52 | 3.13 | 63.06 | 22.92 | 163.90 | 42.43 | 41.77 | 12.30 | 9.31 | 4.97 | 4.77 | 40.89 | 98.75 | 21.87 | 47.13 | 26.85 |
| J-5-10 | 3.42 | 3.96 | 68.45 | 24.15 | 159.73 | 37.35 | 44.35 | 15.35 | 8.46 | 4.47 | 4.02 | 47.75 | 102.82 | 31.01 | 70.07 | 41.79 |
| J-5-11 | 4.11 | 3.66 | 68.43 | 26.09 | 182.37 | 31.51 | 45.18 | 14.83 | 10.26 | 4.86 | 7.80 | 46.35 | 106.44 | 23.50 | 56.35 | 30.10 |
| J-5-12 | 4.50 | 3.53 | 72.18 | 26.42 | 181.46 | 43.48 | 43.64 | 14.64 | 3.65 | 4.53 | 4.42 | 79.34 | 120.58 | 42.39 | 84.13 | 47.18 |
| J-5-13 | 3.09 | 4.39 | 80.30 | 21.53 | 137.33 | 29.76 | 54.07 | 8.95 | 8.92 | 1.80 | 1.10 | 51.76 | 97.45 | 42.38 | 99.46 | 55.62 |
| J-5-14 | 3.03 | 4.65 | 79.97 | 26.67 | 145.00 | 25.29 | 57.20 | 9.30 | 8.13 | 1.83 | 2.00 | 42.90 | 81.46 | 25.75 | 63.13 | 36.44 |
| J-5-15 | 4.70 | 3.45 | 70.85 | 25.15 | 178.54 | 40.96 | 48.50 | 11.41 | 2.92 | 2.96 | 2.47 | 54.25 | 76.93 | 27.73 | 62.50 | 32.34 |
| J-5-16 | 3.17 | 2.30 | 47.34 | 18.30 | 139.78 | 47.19 | 35.37 | 18.87 | 36.83 | 6.33 | 5.99 | 52.29 | 102.00 | 24.15 | 50.26 | 27.23 |
| J-11-1 | 10.31 | 6.34 | 50.52 | 18.17 | 142.19 | 71.08 | 8.43 | 41.15 | 5.45 | 7.37 | 7.01 | 40.78 | 97.05 | 15.54 | 30.87 | 15.15 |
| J-11-2 | 10.20 | 9.19 | 70.22 | 32.56 | 142.78 | 39.63 | 8.29 | 15.94 | 5.33 | 1.59 | 0.66 | 57.09 | 96.29 | 26.00 | 48.92 | 26.77 |
| J-11-3 | 12.05 | 10.33 | 68.41 | 32.68 | 132.30 | 55.13 | 7.15 | 9.59 | 10.87 | 1.26 | 1.18 | 57.61 | 96.14 | 22.99 | 44.12 | 22.57 |
| J-11-4 | 7.74 | 7.67 | 76.43 | 30.75 | 135.65 | 45.84 | 10.76 | 8.64 | 1.15 | 1.17 | 0.00 | 58.32 | 92.96 | 25.28 | 50.71 | 31.16 |
| J-11-5 | 6.48 | 6.60 | 78.27 | 28.12 | 123.45 | 49.73 | 9.44 | 6.58 | 1.33 | 0.74 | 0.02 | 60.52 | 94.31 | 26.94 | 53.00 | 33.25 |
| J-11-6 | 8.15 | 7.28 | 76.58 | 34.04 | 148.03 | 46.44 | 8.95 | 6.88 | 1.79 | 1.03 | 0.04 | 58.48 | 93.08 | 26.66 | 52.89 | 36.97 |
| J-11-7 | 5.91 | 7.21 | 77.80 | 30.22 | 125.31 | 50.83 | 10.53 | 6.07 | 0.76 | 0.91 | 0.17 | 62.91 | 89.30 | 34.82 | 69.04 | 39.89 |
| J-11-8 | 6.51 | 7.44 | 77.36 | 31.21 | 135.89 | 57.83 | 9.39 | 5.41 | 1.28 | 0.44 | 0.06 | 62.05 | 90.31 | 27.05 | 55.35 | 33.46 |
| J-11-9 | 6.53 | 7.35 | 76.92 | 30.35 | 128.86 | 45.08 | 8.93 | 4.31 | 1.07 | 1.14 | 0.21 | 64.12 | 96.11 | 34.24 | 72.46 | 40.20 |
| J-11-10 | 5.98 | 7.03 | 77.49 | 29.61 | 134.54 | 46.03 | 9.18 | 6.17 | 0.74 | 1.01 | 0.08 | 62.57 | 91.55 | 31.53 | 66.51 | 39.23 |
| J-13-1 | 14.73 | 12.16 | 68.08 | 16.86 | 84.30 | 17.28 | 2.49 | 1.04 | 0.23 | 0.93 | 0.20 | 42.38 | 62.67 | 19.09 | 40.56 | 17.74 |
| J-13-2 | 11.89 | 9.97 | 64.11 | 17.39 | 107.49 | 30.07 | 3.80 | 11.68 | 0.70 | 6.65 | 0.64 | 68.45 | 60.32 | 38.14 | 60.81 | 29.81 |
| J-13-3 | 14.51 | 12.73 | 69.14 | 19.39 | 83.45 | 23.22 | 2.41 | 7.71 | 0.74 | 0.53 | 0.04 | 33.73 | 69.30 | 12.12 | 23.89 | 10.17 |
| J-13-4 | 12.01 | 10.84 | 66.86 | 21.88 | 112.90 | 30.96 | 6.09 | 12.04 | 0.42 | 2.65 | 0.77 | 51.66 | 69.00 | 23.23 | 44.28 | 21.23 |
| J-13-5 | 14.31 | 11.43 | 66.11 | 14.78 | 79.75 | 24.52 | 2.77 | 6.81 | 0.52 | 2.53 | 0.33 | 77.11 | 50.26 | 48.65 | 85.78 | 39.53 |
| J-13-6 | 14.28 | 12.66 | 68.35 | 18.59 | 89.60 | 19.44 | 6.37 | 12.89 | 3.99 | 0.78 | 0.32 | 36.61 | 70.64 | 13.00 | 25.97 | 11.24 |
| J-10-8 | 5.93 | 7.59 | 76.95 | 51.43 | 260.29 | 67.09 | 18.27 | 14.92 | 1.67 | 4.25 | 0.49 | 68.36 | 179.15 | 34.74 | 78.94 | 50.78 |
| J-10-9 | 8.63 | 6.10 | 66.98 | 43.85 | 272.53 | 80.47 | 23.10 | 30.44 | 5.92 | 8.61 | 1.14 | 55.00 | 120.97 | 15.55 | 34.32 | 22.99 |
| J-10-10 | 5.31 | 8.05 | 77.17 | 51.22 | 245.58 | 71.84 | 18.86 | 15.53 | 1.85 | 4.44 | 0.37 | 71.60 | 186.09 | 41.09 | 98.04 | 65.50 |
| J-10-11 | 6.37 | 8.15 | 78.02 | 57.67 | 295.58 | 77.06 | 16.04 | 16.33 | 2.75 | 3.63 | 0.39 | 65.29 | 156.05 | 25.95 | 63.76 | 42.24 |
| J-10-12 | 6.30 | 7.80 | 75.61 | 50.68 | 255.70 | 70.38 | 17.23 | 15.43 | 4.96 | 4.02 | 0.92 | 66.01 | 170.06 | 36.52 | 84.48 | 52.57 |
| J-10-1 | 5.68 | 9.16 | 76.42 | 56.24 | 303.64 | 71.63 | 13.43 | 11.21 | 3.76 | 1.52 | 1.09 | 89.44 | 144.80 | 28.56 | 72.96 | 58.23 |
| J-10-2 | 7.16 | 8.15 | 72.58 | 53.27 | 321.27 | 65.43 | 13.19 | 16.98 | 2.52 | 2.87 | 1.38 | 65.44 | 142.19 | 14.60 | 35.62 | 22.69 |
| J-10-3 | 8.81 | 8.53 | 75.03 | 54.96 | 321.84 | 62.35 | 10.84 | 11.94 | 0.67 | 1.01 | 0.77 | 63.94 | 131.70 | 15.10 | 35.29 | 22.54 |
| J-10-4 | 4.71 | 7.92 | 81.72 | 54.51 | 282.67 | 51.57 | 13.78 | 10.44 | 2.50 | 0.73 | 0.43 | 69.23 | 144.20 | 22.11 | 49.38 | 37.52 |
| J-10-5 | 4.23 | 7.18 | 78.73 | 49.77 | 272.10 | 50.43 | 31.02 | 18.17 | 8.08 | 0.88 | 0.78 | 61.47 | 130.42 | 19.89 | 45.52 | 35.87 |
| J-10-6 | 5.43 | 8.41 | 81.16 | 61.80 | 311.53 | 56.76 | 13.83 | 11.52 | 1.86 | 0.71 | 0.33 | 61.96 | 138.64 | 18.93 | 42.63 | 31.28 |
| J-10-7 | 4.89 | 7.36 | 80.60 | 55.66 | 290.07 | 48.19 | 16.05 | 8.81 | 2.71 | 1.00 | 0.46 | 60.32 | 149.86 | 18.30 | 41.31 | 31.95 |
| J-14-2 | 15.02 | 10.59 | 60.23 | 6.67 | 91.25 | 30.93 | 7.74 | 13.40 | 2.36 | 3.92 | 1.04 | 89.19 | 63.56 | 26.46 | 63.29 | 34.94 |
| J-14-3 | 14.41 | 11.22 | 59.89 | 8.93 | 99.47 | 34.28 | 9.31 | 16.67 | 3.80 | 3.18 | 1.69 | 114.33 | 68.68 | 38.73 | 91.12 | 53.45 |
| J-14-4 | 16.06 | 9.90 | 62.73 | 7.37 | 92.70 | 26.66 | 4.54 | 9.56 | 4.08 | 2.35 | 0.87 | 54.70 | 57.69 | 18.58 | 34.39 | 15.36 |
| J-14-5 | 16.76 | 10.91 | 63.94 | 7.43 | 90.45 | 22.10 | 3.14 | 5.42 | 3.42 | 1.40 | 1.04 | 50.05 | 54.72 | 18.71 | 38.08 | 15.75 |
| J-14-6 | 13.19 | 10.85 | 63.21 | 11.09 | 149.27 | 28.71 | 4.23 | 14.14 | 1.19 | 4.47 | 0.22 | 100.35 | 77.18 | 17.40 | 41.64 | 26.50 |
| J-17-1 | 3.12 | 7.98 | 13.06 | 5.85 | 41.31 | 6.88 | 17.65 | 11.90 | 0.42 | 0.00 | 0.00 | 116.50 | 58.84 | 2.78 | 5.82 | 2.89 |
| J-17-2 | 4.28 | 6.18 | 81.19 | 15.84 | 90.25 | 19.33 | 82.58 | 22.02 | 3.12 | 1.28 | 1.72 | 41.10 | 81.03 | 8.68 | 18.20 | 10.18 |
| J-17-3 | 8.77 | 14.80 | 72.84 | 25.72 | 195.14 | 22.01 | 103.14 | 39.79 | 0.33 | 0.26 | 0.52 | 193.61 | 88.52 | 10.59 | 22.67 | 12.46 |
| J-17-4 | 0.61 | 95.72 | 1.74 | 9.51 | 1.02 | 4.53 | 0.39 | 1.24 | 0.00 | 0.13 | 0.00 | 2484.67 | 18.46 | 8.41 | 15.58 | 9.68 |
| J-17-5 | 3.44 | 5.62 | 80.49 | 15.18 | 84.28 | 12.43 | 77.42 | 21.62 | 3.29 | 1.75 | 2.57 | 43.74 | 90.34 | 10.43 | 21.79 | 12.32 |
| J-17-6 | 0.68 | 2.82 | 1.65 | 1.60 | 16.86 | 7.98 | 1.19 | 1.77 | 0.86 | 7.62 | 1.72 | 123.23 | 36.06 | 0.20 | 0.54 | 0.25 |
| J-17-7 | 2.76 | 6.18 | 85.53 | 12.66 | 56.54 | 12.51 | 81.94 | 18.11 | 5.49 | 0.54 | 0.08 | 36.81 | 69.39 | 7.69 | 16.20 | 9.45 |
| J-17-8 | 4.66 | 5.61 | 80.44 | 15.28 | 84.92 | 21.42 | 71.10 | 16.61 | 18.00 | 1.01 | 3.20 | 50.38 | 83.56 | 10.76 | 22.20 | 10.87 |
| J-17-9 | 7.51 | 32.71 | 56.49 | 22.56 | 171.93 | 27.20 | 80.25 | 35.05 | 0.16 | 0.51 | 0.00 | 687.66 | 70.16 | 10.18 | 21.48 | 12.96 |
| J-17-10 | 5.38 | 6.96 | 83.94 | 22.17 | 135.10 | 15.01 | 97.81 | 34.29 | 0.25 | 0.17 | 0.00 | 40.10 | 87.58 | 10.14 | 20.39 | 12.01 |
| J-17-11 | 4.69 | 6.72 | 84.23 | 22.66 | 134.74 | 22.91 | 94.42 | 34.33 | 0.73 | 0.35 | 0.38 | 32.63 | 71.79 | 9.33 | 21.18 | 11.31 |
| J-17-12 | 4.09 | 6.71 | 83.88 | 20.86 | 113.08 | 19.87 | 88.24 | 29.30 | 6.05 | 0.40 | 0.68 | 33.79 | 72.17 | 9.19 | 20.32 | 11.62 |
| J-17-13 | 6.11 | 6.47 | 80.38 | 24.37 | 160.89 | 25.65 | 95.65 | 31.09 | 0.89 | 0.81 | 0.88 | 42.20 | 89.05 | 11.45 | 24.59 | 13.37 |
| J-17-14 | 6.79 | 6.75 | 82.16 | 26.52 | 210.72 | 24.35 | 109.65 | 46.73 | 0.70 | 0.67 | 0.00 | 37.21 | 89.33 | 10.17 | 22.69 | 13.08 |
| J-17-15 | 0.40 | 0.01 | 0.62 | 1.71 | 60.91 | 12.75 | 1.33 | 6.75 | 0.77 | 8.71 | 16.22 | 7.21 | 65.62 | 0.01 | 0.04 | 0.00 |
| J-17-16 | 7.51 | 7.26 | 79.92 | 25.81 | 213.89 | 25.19 | 103.39 | 43.24 | 8.36 | 0.66 | 0.44 | 47.86 | 89.23 | 9.73 | 21.94 | 12.20 |
| J-17-17 | 6.06 | 6.91 | 82.62 | 23.94 | 162.10 | 22.12 | 97.02 | 35.92 | 0.75 | 0.10 | 0.19 | 41.27 | 80.74 | 9.71 | 20.21 | 12.10 |
| J-17-18 | 7.66 | 1.07 | 34.90 | 22.23 | 91.02 | 10.18 | 17.04 | 7.21 | 0.00 | 4.60 | 5.99 | 24.65 | 42.89 | 0.36 | 0.85 | 0.52 |
| J-17-19 | 8.13 | 6.25 | 78.29 | 15.78 | 134.84 | 28.16 | 105.65 | 45.94 | 17.72 | 0.77 | 0.99 | 59.69 | 95.61 | 20.09 | 39.35 | 20.39 |
| J-17-20 | 8.91 | 6.36 | 76.09 | 12.32 | 155.00 | 33.59 | 120.94 | 62.83 | 2.10 | 1.80 | 0.43 | 35.76 | 87.51 | 9.44 | 21.33 | 10.73 |
| J-17-21 | 8.32 | 6.13 | 75.50 | 13.71 | 132.79 | 25.25 | 100.92 | 45.40 | 10.11 | 1.89 | 1.93 | 41.64 | 90.34 | 10.35 | 23.39 | 10.90 |
| J-17-22 | 7.38 | 6.88 | 81.96 | 12.85 | 137.06 | 22.70 | 116.26 | 55.06 | 0.90 | 0.39 | 0.25 | 38.66 | 95.23 | 9.42 | 21.09 | 10.76 |
| J-17-23 | 8.05 | 6.61 | 81.10 | 13.54 | 136.21 | 25.41 | 118.83 | 58.71 | 2.04 | 0.65 | 0.32 | 37.07 | 93.41 | 9.52 | 20.90 | 11.89 |
| J-17-24 | 8.69 | 5.94 | 68.62 | 16.67 | 131.84 | 24.06 | 88.20 | 45.88 | 30.42 | 2.10 | 4.55 | 42.44 | 105.51 | 15.23 | 32.66 | 16.93 |
| J-4-1 | 1.14 | 3.14 | 84.72 | 5.14 | 30.95 | 14.25 | 51.89 | 38.16 | 7.88 | 1.99 | 2.74 | 35.01 | 65.90 | 11.67 | 19.85 | 12.38 |
| J-4-2 | 0.67 | 1.57 | 91.84 | 3.12 | 21.52 | 13.31 | 84.10 | 29.04 | 1.51 | 1.79 | 2.31 | 15.74 | 31.33 | 12.35 | 18.94 | 11.67 |
| J-4-3 | 0.59 | 0.92 | 90.01 | 3.81 | 89.35 | 11.89 | 152.34 | 45.71 | 1.20 | 2.04 | 3.26 | 21.62 | 46.88 | 20.04 | 34.81 | 19.79 |
| J-4-4 | 0.60 | 1.26 | 93.02 | 4.12 | 97.75 | 12.78 | 176.97 | 53.00 | 0.69 | 1.12 | 1.03 | 12.37 | 30.68 | 21.80 | 38.07 | 23.01 |
| J-4-5 | 0.92 | 1.46 | 90.43 | 4.31 | 122.54 | 18.30 | 195.42 | 57.92 | 7.48 | 1.56 | 2.86 | 20.21 | 37.31 | 20.32 | 31.65 | 18.13 |
| J-4-6 | 0.87 | 1.79 | 91.78 | 3.22 | 102.04 | 7.64 | 167.22 | 42.83 | 1.36 | 0.65 | 0.65 | 11.88 | 22.94 | 9.45 | 16.54 | 9.97 |
| J-4-7 | 0.61 | 1.22 | 92.01 | 3.15 | 84.86 | 10.58 | 166.99 | 49.25 | 2.06 | 1.43 | 0.59 | 13.35 | 26.30 | 20.90 | 34.82 | 19.29 |
| J-4-8 | 0.65 | 1.25 | 89.91 | 3.75 | 74.10 | 14.03 | 134.45 | 41.55 | 14.63 | 2.06 | 3.29 | 20.07 | 47.29 | 41.05 | 97.67 | 37.80 |
| J-4-9 | 0.95 | 1.26 | 91.87 | 2.57 | 48.12 | 10.77 | 141.90 | 44.26 | 1.41 | 0.92 | 1.14 | 19.53 | 35.45 | 21.47 | 34.13 | 22.53 |
| J-4-10 | 1.19 | 2.67 | 91.24 | 3.29 | 57.30 | 14.26 | 126.89 | 41.57 | 3.42 | 1.39 | 1.23 | 92.22 | 30.20 | 32.49 | 54.40 | 28.10 |
| J-4-11 | 1.13 | 0.99 | 83.08 | 4.08 | 115.58 | 20.61 | 196.60 | 63.07 | 0.72 | 3.24 | 8.21 | 23.58 | 52.66 | 17.39 | 30.29 | 17.82 |
| J-4-12 | 0.94 | 1.44 | 89.63 | 3.34 | 88.59 | 13.83 | 135.21 | 35.03 | 1.93 | 1.96 | 1.58 | 12.71 | 27.54 | 15.44 | 26.85 | 17.08 |
| J-4-13 | 0.82 | 1.41 | 90.07 | 3.26 | 60.78 | 12.85 | 123.03 | 41.96 | 1.36 | 1.07 | 2.54 | 14.24 | 28.50 | 16.20 | 30.00 | 19.17 |
| J-7-1 | 0.99 | 2.88 | 89.07 | 5.46 | 44.20 | 6.03 | 99.91 | 13.33 | 3.89 | 1.16 | 0.32 | 23.76 | 63.00 | 8.30 | 16.31 | 8.37 |
| J-7-2 | 3.97 | 2.27 | 60.22 | 13.02 | 99.31 | 29.16 | 50.27 | 34.85 | 30.41 | 7.81 | 4.71 | 49.96 | 111.26 | 13.42 | 24.71 | 13.63 |
| J-7-3 | 1.35 | 3.11 | 85.10 | 9.38 | 74.43 | 10.95 | 82.80 | 22.50 | 43.01 | 1.28 | 1.58 | 35.99 | 84.14 | 19.12 | 37.84 | 19.82 |
| J-7-4 | 6.58 | 2.55 | 82.80 | 20.13 | 115.70 | 29.00 | 65.13 | 14.13 | 6.42 | 1.31 | 1.50 | 34.21 | 55.64 | 9.81 | 19.55 | 12.19 |
| J-7-5 | 1.78 | 2.42 | 80.83 | 17.56 | 124.27 | 25.39 | 101.34 | 11.17 | 8.98 | 2.60 | 3.09 | 40.33 | 81.60 | 16.12 | 35.13 | 20.13 |
| J-7-6 | 1.51 | 3.24 | 75.55 | 19.12 | 148.73 | 11.05 | 98.30 | 9.98 | 24.27 | 2.24 | 2.65 | 50.33 | 83.97 | 30.74 | 74.15 | 46.02 |
| J-7-7 | 2.33 | 2.47 | 65.75 | 17.03 | 141.91 | 19.73 | 78.76 | 11.95 | 14.74 | 3.37 | 6.03 | 63.51 | 101.01 | 29.96 | 58.44 | 38.80 |
| J-7-8 | 1.17 | 2.46 | 80.13 | 12.57 | 116.37 | 16.64 | 103.49 | 16.19 | 12.86 | 3.29 | 5.90 | 47.92 | 96.49 | 58.32 | 81.63 | 57.49 |
| J-7-9 | 1.65 | 2.82 | 82.54 | 11.56 | 83.19 | 16.11 | 74.42 | 14.60 | 14.60 | 2.13 | 2.38 | 42.69 | 95.70 | 17.74 | 33.80 | 18.41 |
| J-7-10 | 2.24 | 2.49 | 74.31 | 10.12 | 89.56 | 25.44 | 68.37 | 26.23 | 11.01 | 4.01 | 3.03 | 38.25 | 89.31 | 11.67 | 23.06 | 12.40 |
| J-7-11 | 1.73 | 2.57 | 81.61 | 13.23 | 101.65 | 21.89 | 79.33 | 13.69 | 17.71 | 2.05 | 3.09 | 46.37 | 106.45 | 23.08 | 45.61 | 24.32 |
| J-7-12 | 2.31 | 2.77 | 80.40 | 21.12 | 151.60 | 16.05 | 97.17 | 15.46 | 11.98 | 2.20 | 2.53 | 43.77 | 84.44 | 33.88 | 74.07 | 45.92 |
| J-7-13 | 1.51 | 3.24 | 75.55 | 19.12 | 148.73 | 11.05 | 98.30 | 9.98 | 24.27 | 2.24 | 2.65 | 50.33 | 83.97 | 30.74 | 74.15 | 46.02 |
| J-7-14 | 1.98 | 2.75 | 81.64 | 17.49 | 120.40 | 12.18 | 98.75 | 10.80 | 10.47 | 2.13 | 3.65 | 43.63 | 78.84 | 18.95 | 40.21 | 23.54 |
| J-7-15 | 0.76 | 2.86 | 86.66 | 9.11 | 67.07 | 7.75 | 90.83 | 10.10 | 6.76 | 1.68 | 1.46 | 34.53 | 71.62 | 14.09 | 30.12 | 16.43 |
